# Supplementary material for: Sequence analysis and protein interactions of Arabidopsis CIA2 and CIL proteins
Source: PubMed Central journal article supplement (PMC7303255; doi:10.1186/s40529-020-00297-z), 2020-06-18
Supplement: 40529_2020_297_MOESM1_ESM.pdf [file 40529_2020_297_MOESM1_ESM.pdf]

## Supplemental Data

Table S1. List of CIA2 and CIL homologous proteins.

The N-terminal 1-200 amino acid sequences of Arabidopsis CIA2 and CIL were subjected to BLAST analysis to identify homologous proteins in the NCBI and Gramene databases. Information on 72 full-length CIA2 and CIL homologues is summarized below.

| Protein name <sup>a</sup>        | Gene symbol /<br>Gene locus <sup>bc</sup>                     | Amino<br>acid | Species                                      | Sequence ID      | Description <sup>d</sup> | Percentage<br>identity to<br>CIA2 FL<br>(%) <sup>e</sup> | E-value <sup>e</sup> | Percentage<br>identity to<br>CIL FL<br>(%) <sup>e</sup> | E-value <sup>e</sup> |
|----------------------------------|---------------------------------------------------------------|---------------|----------------------------------------------|------------------|--------------------------|----------------------------------------------------------|----------------------|---------------------------------------------------------|----------------------|
| Aegta_CIL-I                      | LOC109759413<br>AET6Gv20305800 <sup>c</sup>                   | 494           | <i>Aegilops tauschii subsp.<br/>tauschii</i> | XP_020173826.1   | CCT(440-483aa)           | 32.15                                                    | 2.00E-47             | 31.39                                                   | 9.00E-49             |
| Aegta_CIL-II                     | LOC109734132                                                  | 457           | <i>Aegilops tauschii subsp.<br/>tauschii</i> | XP_020148948.1   | CCT(401-445aa)           | 27.4                                                     | 4.00E-23             | 28.64                                                   | 3.00E-25             |
| Aegta_Uncharacterized<br>protein | AET7Gv21020300 <sup>c</sup>                                   | 267           | <i>Aegilops tauschii subsp.<br/>tauschii</i> | UniProtKB-M8BAB9 | -                        | 39.39                                                    | 6.00E-11             | 38.95                                                   | 2.00E-09             |
| Ambtr_CIA2                       | LOC18440680 <sup>b</sup><br>AMTR_s00025p00156240 <sup>c</sup> | 436           | <i>Amborella trichopoda</i>                  | XP_006850881.1   | CCT(382-425aa)           | 32.53                                                    | 3.00E-44             | 32.39                                                   | 8.00E-43             |
| Araly_CIA2-I                     | LOC9305708 <sup>b</sup>                                       | 392           | <i>Arabidopsis lyrata</i>                    | XP_002867585.1   | CCT(339-382aa)           | 55.48                                                    | 2.00E-132            | 85.71                                                   | 0                    |
| Araly_CIA2-II                    | LOC9302264 <sup>b</sup>                                       | 438           | <i>Arabidopsis lyrata</i>                    | XP_020866733.1   | CCT(386-429aa)           | 87.97                                                    | 0                    | 56.36                                                   | 1.00E-131            |
| CIL<br>(CMF9 <sup>a</sup> )      | AT4G25990 <sup>b</sup>                                        | 394           | <i>Arabidopsis thaliana</i>                  | NP_567737.1      | CCT(341-384aa)           | 55.98                                                    | 1.00E-129            | 100                                                     | 0                    |
| CIA2<br>(CMF14 <sup>a</sup> )    | AT5G57180 <sup>b</sup>                                        | 435           | <i>Arabidopsis thaliana</i>                  | NP_568852.2      | CCT(383-426aa)           | 100                                                      | 0                    | 54.5                                                    | 2.00E-129            |
| Bradi_CMF7 <sup>a</sup>          | LOC100822180 <sup>b</sup><br>BRADI_1g34060 <sup>c</sup>       | 448           | <i>Brachypodium distachyon</i>               | XP_003560511.1   | CCT(398-436aa)           | 40                                                       | 4.00E-10             | 28.5                                                    | 5.00E-26             |
| Bradi_CMF3 <sup>a</sup>          | LOC100822550 <sup>b</sup><br>BRADI_3g03770 <sup>c</sup>       | 459           | <i>Brachypodium distachyon</i>               | XP_014756479.1   | CCT(416-452aa)           | 32.48                                                    | 5.00E-38             | 33                                                      | 3.00E-38             |
| Bran_CIA2-I                      | LOC106444616 <sup>b</sup><br>BnaA01g15160D <sup>c</sup>       | 382           | <i>Brassica napus</i>                        | XP_013741528.1   | CCT(327-372aa)           | 53.29                                                    | 3.00E-130            | 64.25                                                   | 1.00E-164            |
| Bran_CIL-I                       | LOC106388956 <sup>b</sup><br>BnaA02g08300D <sup>c</sup>       | 392           | <i>Brassica napus</i>                        | XP_013684589.1   | CCT(340-383aa)           | 64.03                                                    | 9.00E-164            | 50.99                                                   | 2.00E-113            |
| Bran_CIL-II                      | LOC106371508 <sup>b</sup><br>BnaA10g11220D <sup>c</sup>       | 397           | <i>Brassica napus</i>                        | XP_013667045.1   | CCT(345-388aa)           | 62.5                                                     | 1.00E-150            | 56.18                                                   | 5.00E-114            |
| Bran_CIL-III                     | LOC106376068 <sup>b</sup><br>BnaC01g17920D <sup>c</sup>       | 391           | <i>Brassica napus</i>                        | XP_013671573.1   | CCT(336-381aa)           | 53.02                                                    | 5.00E-131            | 64.51                                                   | 3.00E-163            |
| Bran_CIA2-II                     | LOC106377535 <sup>b</sup>                                     | 386           | <i>Brassica napus</i>                        | XP_013673245.1   | CCT(334-377aa)           | 60.22                                                    | 5.00E-153            | 50.37                                                   | 7.00E-109            |

|                                       |                                                         |     |                                       |                      |                |       |           |       |           |
|---------------------------------------|---------------------------------------------------------|-----|---------------------------------------|----------------------|----------------|-------|-----------|-------|-----------|
|                                       | BnaC02g11770D <sup>c</sup>                              |     |                                       |                      |                |       |           |       |           |
| Brana_CIA2-III                        | LOC106409124 <sup>b</sup><br>BnaC07g39980D <sup>c</sup> | 397 | <i>Brassica napus</i>                 | XP_013705259.1       | CCT(344-389aa) | 50.66 | 1.00E-96  | 63.1  | 5.00E-127 |
| Brana_CIL-IV                          | LOC106418421 <sup>b</sup><br>BnaC09g53340D <sup>c</sup> | 398 | <i>Brassica napus</i>                 | XP_013714579.1       | CCT(346-389aa) | 63.98 | 3.00E-159 | 56.61 | 7.00E-121 |
| Capru_CIA2-I                          | LOC17879835                                             | 392 | <i>Capsella rubella</i>               | XP_006283882.1       | CCT(339-382aa) | 53.54 | 1.00E-117 | 78.3  | 0         |
| Capru_CIA2-II                         | LOC17876953                                             | 436 | <i>Capsella rubella</i>               | XP_006280489.1       | CCT(384-427aa) | 71.71 | 0         | 51.05 | 8.00E-115 |
| Capru_CIL                             | LOC107877814                                            | 441 | <i>Capsicum annuum</i>                | XP_016580048.1       | CCT(375-417aa) | 43.76 | 4.00E-86  | 42.4  | 9.00E-79  |
| Capba_CCT protein                     | CQW23_16970                                             | 415 | <i>Capsicum baccatum</i>              | PHT42945.1           | CCT(364-407aa) | 43.74 | 6.00E-88  | 43.44 | 2.00E-80  |
| Capch_CCT protein                     | BC332_18791                                             | 442 | <i>Capsicum chinense</i>              | PHU11861.1           | CCT(376-434aa) | 43.76 | 9.00E-87  | 42.65 | 6.00E-79  |
| Cicar_CIL-I                           | LOC101508698                                            | 400 | <i>Cicer arietinum</i>                | XP_004507897.1       | CCT(354-396aa) | 46.56 | 2.00E-91  | 42.33 | 2.00E-78  |
| Cicar_CIL-II                          | LOC101511273                                            | 303 | <i>Cicer arietinum</i>                | XP_004487994.2       | -              | 32.34 | 2.00E-30  | 30.77 | 8.00E-25  |
| Ginbi_COL16                           | N/A                                                     | 436 | <i>Ginkgo biloba</i>                  | ASW41094.1           | CCT(381-424aa) | 44.62 | 1.00E-23  | 42.64 | 6.00E-22  |
| Glyma_CIA2-I                          | LOC100783619<br>GLYMA_09G059800 <sup>c</sup>            | 374 | <i>Glycine max</i>                    | XP_006586995.1       | CCT(344-373aa) | 34.18 | 2.00E-46  | 35.75 | 3.00E-40  |
| Glyma_CIA2-II                         | LOC100784788<br>GLYMA_13G100700 <sup>c</sup>            | 399 | <i>Glycine max</i>                    | XP_003543009.1       | CCT(349-391aa) | 43.58 | 2.00E-76  | 44.16 | 6.00E-78  |
| Glyma_CIA2-III                        | LOC102670319<br>GLYMA_15G166500 <sup>c</sup>            | 395 | <i>Glycine max</i>                    | XP_006597800.1       | -              | 34.34 | 4.00E-46  | 32.64 | 2.00E-36  |
| Glyma_CIA2-IV                         | LOC100810303<br>GLYMA_17G059100 <sup>c</sup>            | 398 | <i>Glycine max</i>                    | XP_003549301.1       | CCT(347-389aa) | 45.11 | 5.00E-79  | 45.29 | 5.00E-77  |
| Horvu_CMF3 <sup>a</sup>               | HORVU6Hr1G021460 <sup>c</sup>                           | 480 | <i>Hordeum vulgare subsp. Vulgare</i> | UniProtKB-A0A287TJQ3 | CCT(436-478aa) | 32.34 | 1.00E-44  | 32.44 | 7.00E-47  |
| Horvu_CIA2 (Horvu_CMF7 <sup>a</sup> ) | HORVU7Hr1G097630 <sup>c</sup>                           | 459 | <i>Hordeum vulgare subsp. Vulgare</i> | SNU42600.1           | CCT(403-448aa) | 29.59 | 2.00E-23  | 27.89 | 2.00E-25  |
| Medtr_CIA2-I                          | LOC11443621<br>MTR_2g038010 <sup>c</sup>                | 313 | <i>Medicago truncatula</i>            | XP_003595074.1       | -              | 32.04 | 6.00E-31  | 30.32 | 6.00E-26  |
| Medtr_CIA2-II                         | LOC11441754<br>MTR_4g127420 <sup>c</sup>                | 379 | <i>Medicago truncatula</i>            | XP_003610054.1       | CCT(342-378aa) | 45.33 | 3.00E-70  | 42.33 | 4.00E-63  |
| Medtr_COL                             | MTR_4g0071811 <sup>b</sup>                              | 393 | <i>Medicago truncatula</i>            | RHN64690.1           | CCT(342-384aa) | 45.78 | 2.00E-75  | 42.64 | 3.00E-68  |
| Nicat_CIL-I                           | LOC109238457<br>A4A49_06707 <sup>c</sup>                | 428 | <i>Nicotiana attenuata</i>            | XP_019260475.1       | CCT(373-415aa) | 43.82 | 2.00E-85  | 42.59 | 7.00E-82  |
| Nicat_CIL-II                          | LOC109238456<br>A4A49_06709 <sup>c</sup>                | 385 | <i>Nicotiana attenuata</i>            | XP_019260474.1       | -              | 39.91 | 1.00E-66  | 41.36 | 2.00E-67  |
| Nicsy_CIL-I                           | LOC104229215                                            | 399 | <i>Nicotiana glauca</i>               | XP_009780110.1       | -              | 42.28 | 5.00E-67  | 40.83 | 3.00E-68  |
| Nicsy_CIL-II                          | LOC104246955                                            | 424 | <i>Nicotiana glauca</i>               | XP_009801175.1       | CCT(373-416aa) | 43.31 | 3.00E-83  | 42.35 | 8.00E-81  |
| Nicta_CIL                             | LOC107760235                                            | 425 | <i>Nicotiana tabacum</i>              | XP_016433772.1       | CCT(370-412aa) | 44.62 | 3.00E-88  | 43.5  | 2.00E-86  |

|                            |                                                                |     |                                      |                      |                |       |          |       |          |
|----------------------------|----------------------------------------------------------------|-----|--------------------------------------|----------------------|----------------|-------|----------|-------|----------|
| Nicto_CIL                  | LOC104090569                                                   | 425 | <i>Nicotiana tomentosiformis</i>     | XP_009593986.1       | CCT(370-413aa) | 44.84 | 6.00E-89 | 43.74 | 4.00E-87 |
| Orybr_CIA2-I               | LOC102710464<br>OB02G13170 <sup>c</sup>                        | 480 | <i>Oryza brachyantha</i>             | XP_006646882.1       | CCT(426-469aa) | 37.55 | 1.00E-34 | 39.74 | 9.00E-37 |
| Orybr_CIA2-II              | LOC102703227<br>OB06G33920 <sup>c</sup>                        | 432 | <i>Oryza brachyantha</i>             | XP_015693696.1       | CCT(371-415aa) | 29.02 | 2.00E-28 | 31.28 | 2.00E-32 |
| Orygla_CCT protein-I       | ORGLA02G0034600 <sup>e</sup>                                   | 484 | <i>Oryza glaberrima</i>              | UniProtKB-I1NX90     | CCT(430-472aa) | 61.61 | 7.00E-34 | 33.19 | 8.00E-47 |
| Orygla_CCT protein-II      | ORGLA06G0219500 <sup>e</sup>                                   | 466 | <i>Oryza glaberrima</i>              | UniProtKB-I1Q4Y2     | CCT(412-454aa) | 29.3  | 7.00E-31 | 29.64 | 6.00E-28 |
| OsI_CMF3 <sup>a</sup>      | OsI_05849<br>BGIOGA007536 <sup>c</sup>                         | 474 | <i>Oryza sativa (Indica Group)</i>   | EAY84475.1           | CCT(430-463aa) | 54.46 | 3.00E-25 | 31.5  | 1.00E-37 |
| OsI_CMF7 <sup>a</sup>      | OsI_24346<br>BGIOGA023549 <sup>c</sup>                         | 466 | <i>Oryza sativa (Indica Group)</i>   | EEC81257.1           | CCT(416-454aa) | 29.3  | 7.00E-31 | 29.64 | 6.00E-28 |
| OsJ_CMF3 <sup>a</sup>      | LOC4328296<br>Os02g0148000 <sup>c</sup>                        | 482 | <i>Oryza sativa (Japonica Group)</i> | XP_015624719.1       | CCT(428-471aa) | 61.61 | 7.00E-34 | 33.41 | 2.00E-46 |
| OsJ_CMF7 <sup>a</sup>      | LOC4341958<br>Os06g0699600 <sup>c</sup>                        | 466 | <i>Oryza sativa (Japonica Group)</i> | XP_015644406.1       | CCT(416-454aa) | 29.07 | 8.00E-30 | 29.4  | 6.00E-27 |
| Phavu_CCT protein          | PHAVU_003G141200g                                              | 380 | <i>Phaseolus vulgaris</i>            | XP_007154712.1       | CCT(340-378aa) | 42.47 | 2.00E-72 | 43.48 | 7.00E-69 |
| Phavu_hypothetical protein | PHAVU_009G236100g                                              | 264 | <i>Phaseolus vulgaris</i>            | XP_007138773.1       | -              | 29.19 | 4.00E-23 | 27.93 | 4.00E-16 |
| Setit_CIA2                 | LOC101763382<br>SETIT_006393mg <sup>c</sup>                    | 459 | <i>Setaria italica</i>               | XP_004966116.1       | -              | 25.6  | 4.00E-15 | 45.21 | 1.00E-13 |
| Setit_CMF3 <sup>a</sup>    | LOC101777609<br>SETIT_017125mg <sup>c</sup>                    | 483 | <i>Setaria italica</i>               | XP_012698033.2       | CCT(429-472aa) | 34.75 | 2.00E-54 | 33.61 | 2.00E-51 |
| Solch_CCT protein          | EJD97_009489                                                   | 432 | <i>Solanum chilense</i>              | TMW95010.1           | CCT(381-423aa) | 44.16 | 8.00E-91 | 43.35 | 8.00E-85 |
| Solly_CIA2                 | LOC101255506<br>Solyc07g008540.3 <sup>c</sup>                  | 432 | <i>Solanum lycopersicum</i>          | XP_004242804.1       | CCT(381-424aa) | 44.35 | 5.00E-91 | 43.12 | 2.00E-84 |
| Solpe_CIA2                 | LOC107026098                                                   | 431 | <i>Solanum pennellii</i>             | XP_015082438.1       | CCT(380-423aa) | 44.01 | 5.00E-92 | 43.22 | 6.00E-87 |
| Soltu_CIL                  | LOC102605364 <sup>b</sup><br>PGSC0003DMG400022983 <sup>c</sup> | 432 | <i>Solanum tuberosum</i>             | XP_006362450.1       | CCT(381-424aa) | 45.72 | 9.00E-92 | 42.2  | 6.00E-82 |
| Sorbi_CMF3 <sup>a</sup>    | LOC8074627<br>SORBI_3004G040100 <sup>c</sup>                   | 486 | <i>Sorghum bicolor</i>               | XP_002451540.1       | CCT(432-475aa) | 33.8  | 4.00E-52 | 44.29 | 4.00E-11 |
| Sorbi_CIA2                 | LOC8065562<br>SORBI_3010G250100 <sup>c</sup>                   | 454 | <i>Sorghum bicolor</i>               | XP_021304472.1       | -              | 40.3  | 3.00E-09 | 34.38 | 2.00E-51 |
| Triae_CCT protein-I        | TraesCS6A02G118000 <sup>c</sup>                                | 492 | <i>Triticum aestivum</i>             | UniProtKB-A0A3B6NM01 | CCT(438-480aa) | 32.48 | 2.00E-46 | 32.45 | 7.00E-48 |
| Triae_CCT protein-II       | TraesCS6B02G146200 <sup>c</sup>                                | 484 | <i>Triticum aestivum</i>             | UniProtKB-A0A3B6PIL6 | CCT(440-482aa) | 30.57 | 8.00E-38 | 31.3  | 3.00E-39 |
| Triae_CCT protein-III      | TraesCS6D02G108000 <sup>c</sup>                                | 494 | <i>Triticum aestivum</i>             | UniProtKB-A0A3B6QBQ3 | CCT(440-482aa) | 32.15 | 2.00E-47 | 31.39 | 9.00E-49 |
| Triae_CCT protein-IV       | TraesCS7A02G422200 <sup>c</sup>                                | 458 | <i>Triticum aestivum</i>             | UniProtKB-A0A3B6RKZ5 | CCT(404-446aa) | 29.12 | 5.00E-25 | 28.68 | 7.00E-28 |
| Triae_CCT protein-V        | TraesCS7B02G322600 <sup>c</sup>                                | 457 | <i>Triticum aestivum</i>             | UniProtKB-A0A3B6SPQ1 | CCT(403-445aa) | 27.69 | 1.00E-23 | 27.76 | 5.00E-26 |

|                                  |                                             |     |                                      |                        |                |       |          |       |          |
|----------------------------------|---------------------------------------------|-----|--------------------------------------|------------------------|----------------|-------|----------|-------|----------|
| Triae_CCT protein-VI             | TraesCS7D02G414400 <sup>c</sup>             | 457 | <i>Triticum aestivum</i>             | UniProtKB - A0A3B6TPS5 | CCT(403-445aa) | 27.4  | 5.00E-23 | 28.64 | 2.00E-25 |
| Tritu_CCT protein-I              | TRITD_6Av1G037420 <sup>bc</sup>             | 482 | <i>Triticum turgidum subsp. duru</i> | VAI43762.1             | CCT(438-480aa) | 31.67 | 6.00E-42 | 31.62 | 2.00E-43 |
| Tritu_CCT protein-II             | TRITD_6Bv1G050550 <sup>bc</sup>             | 501 | <i>Triticum turgidum subsp. duru</i> | VAI55361.1             | CCT(440-482aa) | 31.46 | 9.00E-42 | 32.23 | 3.00E-43 |
| Tritu_CCT protein-III            | TRITD_7Av1G227500 <sup>bc</sup>             | 453 | <i>Triticum turgidum subsp. duru</i> | VAI79113.1             | CCT(399-441aa) | 29.12 | 5.00E-25 | 28.68 | 6.00E-28 |
| Tritu_CCT protein-IV             | TRITD_7Bv1G176630 <sup>bc</sup>             | 457 | <i>Triticum turgidum subsp. duru</i> | VAI91171.1             | CCT(403-445aa) | 27.69 | 1.00E-23 | 27.76 | 5.00E-26 |
| Zeama_Uncharacterized protein-I  | LOC100501277<br>Zm00001d014664 <sup>e</sup> | 435 | <i>Zea mays</i>                      | NP_001353852.1         | -              | 26.7  | 4.00E-14 | 26.91 | 5.00E-18 |
| Zeama_CIA2-I                     | LOC103626617<br>Zm00001d015268 <sup>e</sup> | 485 | <i>Zea mays</i>                      | XP_008645243.1         | CCT(431-474aa) | 33.74 | 5.00E-50 | 33.96 | 1.00E-50 |
| Zeama_Uncharacterized protein-II | LOC100384273<br>Zm00001d036485 <sup>e</sup> | 443 | <i>Zea mays</i>                      | NP_001170309.2         | -              | 26.24 | 2.00E-17 | 26.37 | 5.00E-17 |
| Zeama_CIA2-II                    | LOC100281423<br>Zm00001d053880 <sup>e</sup> | 459 | <i>Zea mays</i>                      | XP_008677196.1         | CCT(405-448aa) | 63.72 | 6.00E-35 | 25.11 | 2.00E-12 |

<sup>a</sup> CMF proteins, as per Cockram et al. (2012).

<sup>b,c</sup> Gene symbol and locus refer to the NCBI or Gramene databases.

<sup>d</sup> CCT-motif fragment, as predicted by PROSITE (prosite.expasy.org).

<sup>e</sup> Identity value and E-value from the NCBI database.
